# Supplementary material for: Pain Assessment in Cattle by Use of Numerical Rating and Visual Analogue Scales—A Systematic Review and Meta-Analysis
Source: MDPI journal article supplement (doi:10.3390/ani14020351), 2024-01-22
Supplement: s1 [file s1]

**Table S2:** Findings of Material and Methods section for 16 references about the assessment of pain in cattle, including funding information. Reference (Ref) of the according studies is indicated.

| Year | Author                     | Ref. | Animal Group               | Survey Form         | Funding Information                                                                                                                                                                                                                |
|------|----------------------------|------|----------------------------|---------------------|------------------------------------------------------------------------------------------------------------------------------------------------------------------------------------------------------------------------------------|
| 2006 | Huxley and Whay            | [9]  | - Adult Cattle<br>- Calves | - Paper             | - Boehringer Ingelheim                                                                                                                                                                                                             |
| 2007 | Hewson et al. <sup>1</sup> | [10] | - Adult Cattle<br>- Calves | - Paper             | - Animal Welfare Foundation of Canada<br>- Sir Dunn Animal Welfare Center, Atlantic Veterinary College, University of Prince Edward Island                                                                                         |
| 2009 | Kielland et al.            | [15] | - Adult Cattle<br>- Calves | - Online            | - None stated                                                                                                                                                                                                                      |
| 2009 | Laven et al.               | [12] | - Adult Cattle<br>- Calves | - Paper             | - Boehringer Ingelheim                                                                                                                                                                                                             |
| 2010 | Kielland et al.            | [19] | - Adult Cattle<br>- Calves | - Paper<br>- Online | - Research Council of Norway (15%)<br>- Agricultural Agreement Research Fund (16%)<br>- Foundation for Research Levy on Agricultural Products (69%)                                                                                |
| 2012 | Thomsen et al.             | [13] | - Adult Cattle             | - Paper             | - Not stated explicitly<br>- Boehringer Ingelheim and Danish Cattle Federation mentioned in Acknowledgments                                                                                                                        |
| 2013 | Becker et al.              | [30] | - Adult Cattle             | - Online            | - Federal Veterinary Office BVET                                                                                                                                                                                                   |
| 2013 | Lorena et al. <sup>2</sup> | [31] | - Not stated               | - Paper<br>- Online | - None stated                                                                                                                                                                                                                      |
| 2013 | Wikman et al.              | [20] | - Adult Cattle<br>- Calves | - Paper             | - Ministry of Agricultural and Forestry in Finland<br>- Finnish Veterinary Foundation<br>- Swedish Cultural Fund<br>- Swedish Ostrobothnian Society<br>- Sponsors: Valio Ltd., Vetman Ltd., Viking Genetics, Osuuskunta Maitosuomi |
| 2014 | Norring et al.             | [22] | - Adult cattle<br>- Calves | - Paper<br>- Online | - Ministry of Agricultural and Forestry in Finland                                                                                                                                                                                 |
| 2015 | Hokkanen et al.            | [32] | - Calves                   | - Paper             | - Ministry of Agricultural and Forestry in Finland<br>- Valio Ltd., Vetman Ltd., Viking Genetics, Osuuskunta Maitosuomi<br>- Hämmäläis-Osakunta personal grant to Tanja Korhonen                                                   |

**Continuing Table S2:** Findings of Material and Methods section for 16 references about the assessment of pain in cattle, including funding information. Reference (**Ref**) of the according studies is indicated.

| Year | Author          | Ref. | Animal Group               | Survey Form         | Funding Information                                                                                     |
|------|-----------------|------|----------------------------|---------------------|---------------------------------------------------------------------------------------------------------|
| 2017 | Remnant et al.  | [1]  | - Adult Cattle<br>- Calves | - Paper<br>- Online | - Boehringer Ingelheim                                                                                  |
| 2020 | Tschoner et al. | [11] | - Adult Cattle<br>- Calves | - Paper<br>- Online | - Bavarian Ministry of Food, Agriculture and Forestry<br>- Boehringer Ingelheim<br>- Pfizer<br>- Merial |
| 2021 | Tschoner et al. | [14] | - Adult Cattle<br>- Calves | - Paper             | - Bavarian Ministry of Food, Agriculture and Forestry<br>- Boehringer Ingelheim<br>- Pfizer<br>- Merial |
| 2022 | Van Dyke et al. | [33] | - Calves                   | - Online            | - No external Funding                                                                                   |
| 2022 | Shi et al.      | [16] | - Adult cattle<br>- Calves | - Online            | - Boehringer Ingelheim Animal Health (Shanghai, China)                                                  |

<sup>1</sup> Survey conducted on pain management in cattle, horses, and pigs

<sup>2</sup> Survey conducted on pain management in cattle and horses
