# Supplementary material for: Pain Assessment in Cattle by Use of Numerical Rating and Visual Analogue Scales—A Systematic Review and Meta-Analysis
Source: Animals (Basel). 2024 Jan 22;14(2):351. doi: 10.3390/ani14020351 (PMC10812761; doi:10.3390/ani14020351)
Supplement: Supplementary file 1 [file animals-14-00351-s001.zip]

Archive with 6 entries (6 files):
- Supplemental S1_PRISMA P checklist.pdf
- Supplemental S2_Material and Methods.pdf
- Supplemental S3 Procedures in Cattle.pdf
- Supplemental S4 Conditions in Cattle.pdf
- Supplemental S5 Procedures in Calves.pdf
- Supplemental S6 Conditions in Calves.pdf
